# Supplementary material for: Air exposure assessment and biological monitoring of manganese and other major welding fume components in welders
Source: Royal Society of Chemistry journal article supplement (doi:10.1039/b605549d), 2006-01-01
Supplement: b605549d.pdf [file b605549d.pdf]

**Table Analytical and quality assurance details in the measurements of elements in urine and blood**

| Element                                          | <sup>1</sup> As                     | <sup>2</sup> Ca        | <sup>1</sup> Cd         | <sup>1</sup> Co         | <sup>1</sup> Cr         | <sup>2</sup> Fe        | <sup>1</sup> Hg                                             | <sup>1</sup> I         | <sup>2</sup> Mg        | <sup>1</sup> Mn         | <sup>1</sup> Ni         | <sup>1</sup> Pb                                             | <sup>1</sup> Se         | <sup>2</sup> Zn        |
|--------------------------------------------------|-------------------------------------|------------------------|-------------------------|-------------------------|-------------------------|------------------------|-------------------------------------------------------------|------------------------|------------------------|-------------------------|-------------------------|-------------------------------------------------------------|-------------------------|------------------------|
| Isotope/emission line(s) used for quantification | <sup>75</sup> As                    | 317,933nm<br>422,673nm | <sup>114</sup> Cd       | <sup>59</sup> Co        | <sup>52</sup> Cr        | 238,204nm<br>239,562nm | <sup>200</sup> Hg<br><sup>201</sup> Hg<br><sup>202</sup> Hg | <sup>127</sup> I       | 279,077nm<br>279,553nm | <sup>55</sup> Mn        | <sup>60</sup> Ni        | <sup>206</sup> Pb<br><sup>207</sup> Pb<br><sup>208</sup> Pb | <sup>78</sup> Se        | 202,548nm<br>206,200nm |
| <sup>a</sup> DL, urine                           | 0,03µg/L                            | 0,12 mg/L              | 0,05µg/L                | 0,001µg/L               | 0,004µg/L               | 9 µg/L                 | 0,05µg/L                                                    | 0,4 µg/L               | 0,11 mg/L              | 0,01µg/L                | 0,03µg/L                |                                                             | 0,6µg/L                 | 0,008 mg/L             |
| <sup>a</sup> DL, whole blood                     |                                     |                        | 0,10µg/L                |                         |                         |                        | 0,20µg/L                                                    |                        |                        | 0,05µg/L                |                         | 0,28µg/L                                                    |                         |                        |
| Seronorm Trace Element Quality control:          |                                     |                        |                         |                         |                         |                        |                                                             |                        |                        |                         |                         |                                                             |                         |                        |
| Urine<br>LOT NO2525                              | 171<br>n=10<br><sup>b</sup> RSD=4,5 | 114<br>n=34<br>RSD=3,7 | 4,88<br>n=10<br>RSD=3,9 | 10,8<br>n=10<br>RSD=2,8 | 19,3<br>n=10<br>RSD=4,0 | 33<br>n=34<br>RSD=11   | 39,3<br>n=10<br>RSD=10                                      | 270<br>n=10<br>RSD=4,5 | 53<br>n=34<br>RSD=1,7  | 10,0<br>n=10<br>RSD=3,1 | 37,1<br>n=10<br>RSD=2,1 |                                                             | 64,1<br>n=10<br>RSD=6,9 | 300<br>n=34<br>RSD=3,3 |
| <sup>c</sup> Recommended value                   | 184<br>U=17                         | 108<br>U=4             | 5,06<br>U=0,22          | 10,1<br>U=0,5           | 20,1<br>U=1,1           | 14<br>U=1,4            | 40,3<br>U=2,6                                               | 282<br>U=18            | 54<br>U=3              | 11,1<br>U=1,0           | 41,5<br>U=2,2           |                                                             | 66,9<br>U=7,1           | 261<br>U=13            |
| Urine<br>LOT NO2524                              | 81<br>n=10<br>RSD=2,5               |                        | 0,10<br>n=10<br>RSD=10  | 0,24<br>n=10<br>RSD=5,4 | 0,83<br>n=10<br>RSD=8,5 |                        | 0,19<br>n=10<br>RSD=5,5                                     | 83<br>n=10<br>RSD=3,2  |                        | 1,9<br>n=10<br>RSD=26   | 7,5<br>n=10<br>RSD=3,2  |                                                             | 12,2<br>n=10<br>RSD=7,4 |                        |
| <sup>c</sup> Recommended value                   | 83<br><sup>d</sup> U=7              |                        | 0,11<br>U=0,01          | 0,21<br>U=0,04          | 0,92<br>U=0,14          |                        | 0,21<br>U=0,04                                              | 84<br>U=5              |                        | 1,3<br>U=0,4            | 7,5<br>U=1,0            |                                                             | 14,4<br>U=2,3           |                        |
| Whole Blood<br>LOT OK0336                        |                                     |                        | 0,70<br>n=23<br>RSD=12  |                         |                         |                        | 2,0<br>n=23<br>RSD=11                                       |                        |                        | 9,2<br>n=23<br>RSD=4,5  |                         | 31<br>n=23<br>7,5<br>33                                     |                         |                        |
| <sup>c</sup> Recommended value                   |                                     |                        | 0,73<br>U=0,07          |                         |                         |                        | 2,06<br>U=0,4                                               |                        |                        | 9,1<br>U=0,7            |                         | n=23<br>U=3                                                 |                         |                        |
| Whole Blood<br>LOT MR9067                        |                                     |                        | 6,27<br>n=17<br>RSD=5,3 |                         |                         |                        | 7,3<br>n=17<br>RSD=11                                       |                        |                        | 11,6<br>n=17<br>RSD=5,8 |                         | 407<br>n=17<br>RSD=5,7                                      |                         |                        |
| <sup>c</sup> Recommended value                   |                                     |                        | 5,6<br>U=0,6            |                         |                         |                        | 7,9<br>U=0,8                                                |                        |                        | 12,5<br>U=1,1           |                         | 398<br>U=21                                                 |                         |                        |

<sup>1</sup> Measured by inductively coupled plasma sector field mass spectrometry; <sup>2</sup> Measured by inductively coupled plasma optical emission;

<sup>a</sup> DL: Detection limit: 3 x standard deviation of all analytical blanks; <sup>b</sup> Relative standard deviation in % (day-to-day variation);

<sup>c</sup> The analytical data of Seronorm<sup>TM</sup> Trace Elements urine is elaborated in collaboration with SGAB Analytica, Luleå, Sweden;

<sup>d</sup> The uncertainty, U, covers the recommended value with 95% confidence
